# Supplementary material for: Mesoporous (101)-TiO2 nanocrystals with tailored Ti3+ and surface oxygen vacancies for boosting photocatalytic hydrogenation of nitrobenzenes
Source: Royal Society of Chemistry journal article supplement (doi:10.1039/d1cy00632k), 2021-01-01
Supplement: d1cy00632k1.pdf [file d1cy00632k1.pdf]

*Supporting Information*

**Mesoporous (101)-TiO<sub>2</sub> nanocrystal with tailored Ti<sup>3+</sup> and surface oxygen vacancy for boosting photocatalytic hydrogenation of nitrobenzenes**

**Fengxia Xu, Jinguo Wang\*, Dianfeng Li, Nianchen Zhang and Yong Men**

*School of Chemistry and Chemical Engineering, Shanghai University of Engineering  
Science, Shanghai 201620, P. R. China*

\*Corresponding author, E-mail address: [Jinguowang1982@sues.edu.cn](mailto:Jinguowang1982@sues.edu.cn), Tel: +86-21  
6787 4046; Fax: +86-21 6779 1215

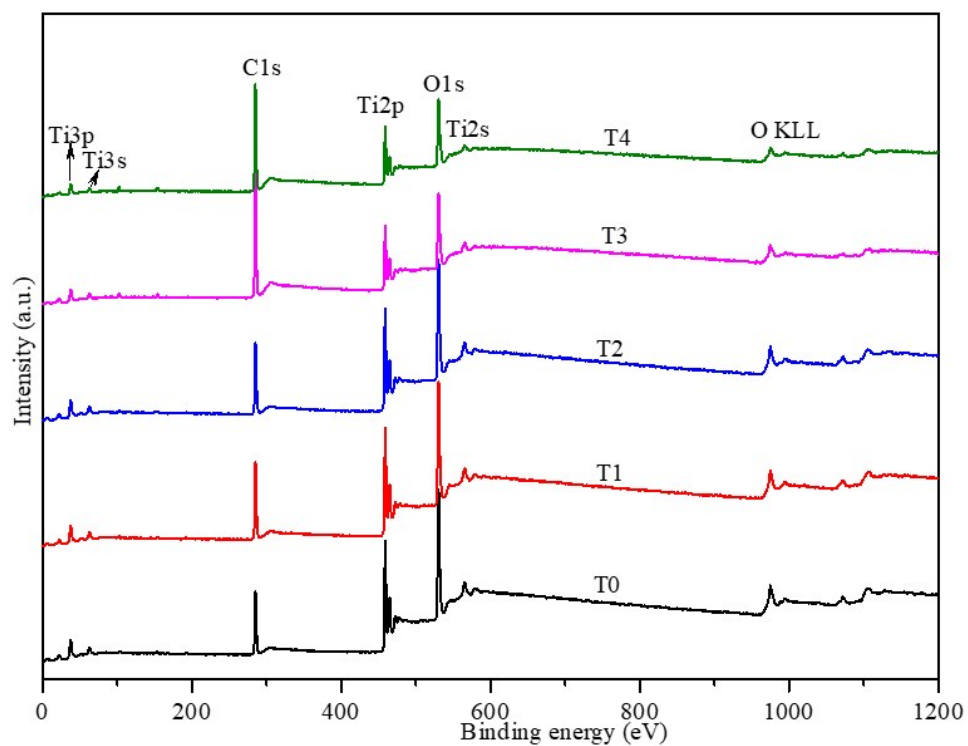

**Fig. S1** XPS surveys of different photocatalysts.

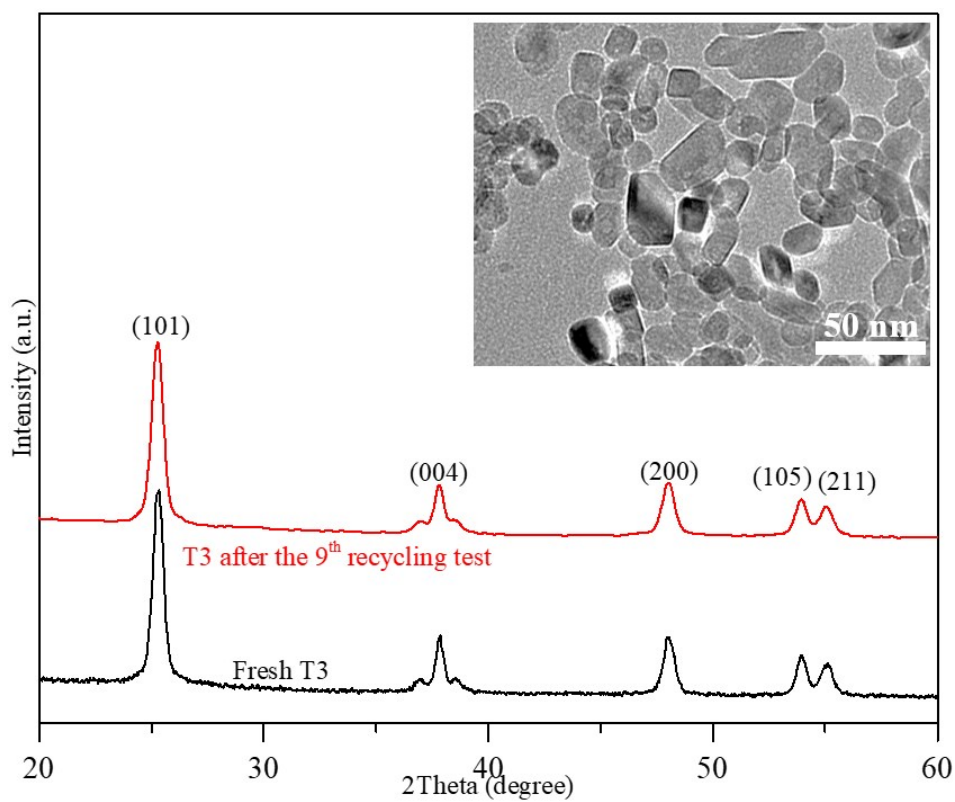

**Fig. S2** TEM image and XRD pattern of T3 for photocatalytic hydrogenation of nitrobenzene after the 9<sup>th</sup> recycling test.
